# Supplementary material
Source: PubMed Central journal article supplement (PMC8684800)
Supplement: NIHMS1747306-supplement-Supp_Table_1.pdf [file NIHMS1747306-supplement-Supp_Table_1.pdf]

**Table S1. Clinical characteristics of subjects who received FMT for recurrent *Clostridioides difficile* infection.**

| Subject | Age | Gender | Number of recurrences | Abx pre CDI | Anti CDI Abx before FMT | PPI use prior to FMT | Prior hospitalization for CDI | # of hosp for CDI | # of prior Standard Vancomycin Courses | # of Prior Vancomycin tapers | # of Prior Flagyl courses | # of Prior Fidaxomicin courses | Anti CDI abx before FMT | BMI pre FMT |
|---------|-----|--------|-----------------------|-------------|-------------------------|----------------------|-------------------------------|-------------------|----------------------------------------|------------------------------|---------------------------|--------------------------------|-------------------------|-------------|
| FMT1    | 66  | F      | 4 times               | Augmentin   | Vancomycin              | No                   | No                            | 0                 | 0                                      | 1                            | 2                         | 0                              | vancomycin              | 21.1        |
| FMT2    | 49  | M      | 3 times               | Unknown     | Vancomycin              | No                   | Yes                           | 1                 | 1                                      | 2                            | 0                         | 0                              | vancomycin              | 18.7        |
| FMT3    | 59  | F      | 5 times               | Levoquin    | Vancomycin              | No                   | Yes                           | 2                 | 3                                      | 1                            | 0                         | 0                              | vancomycin              | 38.2        |
| FMT4    | 40  | F      | 3 times               | Ceftin      | Fidaxomicin             | No                   | No                            | 0                 | 0                                      | 0                            | 1                         | 2                              | fidaxomicin             | 28.9        |
| FMT5    | 62  | F      | 5 times               | Augmentin   | Vancomycin              | No                   | No                            | 0                 | 0                                      | 1                            | 4                         | 0                              | vancomycin              | 25.4        |
| FMT6    | 61  | F      | 4 times               | Doxycycline | Vancomycin              | Yes                  | Yes                           | 4                 | 2                                      | 2                            | 0                         | 0                              | vancomycin              | 27.8        |
| FMT7    | 39  | F      | 3 times               | Unknown     | Vancomycin              | No                   | No                            | 0                 | 2                                      | 1                            | 0                         | 0                              | vancomycin              | 21.4        |
| FMT8    | 83  | F      | 4 times               | Ancef       | Vancomycin              | No                   | Yes                           | 1                 | 2                                      | 2                            | 0                         | 0                              | vancomycin              | 24.7        |
| FMT9    | 34  | F      | 3 times               | Clindamycin | Vancomycin              | No                   | Yes                           | 1                 | 2                                      | 0                            | 1                         | 0                              | vancomycin              | 21.6        |

FMT, faecal microbiota transplantation; Abx, antibiotics; CDI, *Clostridioides difficile* infection.
