# Supplementary material
Source: PubMed Central journal article supplement (PMC8684800)
Supplement: NIHMS1747306-supplement-Supp_Table_2.pdf [file NIHMS1747306-supplement-Supp_Table_2.pdf]

**Table S2. Pfam entries used for taxonomic classification.**

| Type                   | Pfam accession | Pfam description                                                     |
|------------------------|----------------|----------------------------------------------------------------------|
| Caudovirales tail      | PF03335        | Phage tail fibre repeat                                              |
|                        | PF03406        | Phage tail fibre repeat                                              |
|                        | PF03903        | Phage T4 tail fibre                                                  |
|                        | PF03906        | Phage T7 tail fibre protein                                          |
|                        | PF04630        | Phage tail tube protein                                              |
|                        | PF04985        | Phage tail tube protein FII                                          |
|                        | PF05100        | Phage minor tail protein L                                           |
|                        | PF05489        | Phage Tail Protein X                                                 |
|                        | PF05709        | Phage tail protein                                                   |
|                        | PF05939        | Phage minor tail protein                                             |
|                        | PF06120        | Tail length tape measure protein                                     |
|                        | PF06141        | Phage minor tail protein U                                           |
|                        | PF06199        | Phage tail tube protein                                              |
|                        | PF06488        | Phage tail tube protein                                              |
|                        | PF06605        | Prophage endopeptidase tail                                          |
|                        | PF06763        | Prophage minor tail protein Z (GPZ)                                  |
|                        | PF06791        | Prophage tail length tape measure protein                            |
|                        | PF06820        | Putative prophage tail fibre C-terminus                              |
|                        | PF06841        | T4-like virus tail tube protein gp19                                 |
|                        | PF08400        | Prophage tail fibre N-terminal                                       |
|                        | PF08813        | Phage tail tube protein, TTP                                         |
|                        | PF08931        | Receptor-binding protein of phage tail base-plate Siphoviridae, head |
|                        | PF09089        | Phage short tail fibre protein gp12, middle domain                   |
|                        | PF09251        | Salmonella phage P22 tail-spike                                      |
|                        | PF09393        | Phage tail tube protein                                              |
|                        | PF09684        | Phage tail protein (Tail_P2_I)                                       |
|                        | PF09718        | Lambda phage tail tape-measure protein (Tape_meas_lam_C)             |
|                        | PF10145        | Phage-related minor tail protein                                     |
|                        | PF10618        | Phage tail tube protein                                              |
|                        | PF11091        | Tail-tube assembly protein                                           |
|                        | PF11650        | P22 tail accessory factor                                            |
|                        | PF11836        | Phage tail tube protein, GTA-gp10                                    |
|                        | PF12604        | Tail fibre protein gp37 C terminal                                   |
|                        | PF14928        | Short tail fibre protein receptor-binding domain                     |
|                        | PF16460        | Phage tail tube, TTP, lambda-like                                    |
|                        | PF16461        | Lambda phage tail tube protein, TTP                                  |
|                        | PF16463        | Phage tail tube protein family                                       |
|                        | PF16532        | Sf6-type phage tail needle knob or tip of some Caudovirales          |
|                        | PF16792        | Phage tail base-plate attachment protein of Caudovirales ORF16       |
|                        | PF16838        | Caudoviral major tail protein N-terminus                             |
|                        | PF17212        | Tail tubular protein                                                 |
| Myoviridae tail sheath | PF04984        | Phage tail sheath protein subtilisin-like domain                     |
|                        | PF16724        | T4-like virus Myoviridae tail sheath stabiliser                      |
|                        | PF17481        | Phage tail sheath protein beta-sandwich domain                       |
|                        | PF17482        | Phage tail sheath C-terminal domain                                  |
| Microviridae capsid    | PF02305        | Capsid protein (F protein)                                           |
